# Supplementary material for: Transcriptomic Modulation by Exosomes Derived from Human Adipose Stem Cells in Neuronal Cells: Insights from mRNA Sequencing Analysis
Source: Research Square preprint supplement (doi:10.21203/rs.3.rs-7778530/v1), 2025-11-03

Supplementary Information

**Transcriptomic Modulation by Exosomes Derived from Human Adipose Stem Cells in Neuronal Cells: Insights from mRNA Sequencing Analysis**

Ekkaphot Khongkla<sup>1,4\*</sup>, Kornkanok Promtap<sup>1</sup>, Jitrawadee Meerasri<sup>2</sup>, Pornphawit Mo-Mai<sup>2</sup>, Wasutorn Chankamngoen<sup>3,4</sup>, Naraporn Sirinonthanawech<sup>4</sup>, Banthit Chetsawang<sup>1,4</sup>

<sup>1</sup> Research Center for Neuroscience, Institute of Molecular Biosciences, Mahidol University, Nakhon Pathom, Thailand

<sup>2</sup> Mahidol University Frontier Research Facility (MU-FRF), Nakhon Pathom, Thailand

<sup>3</sup> Center for Advanced Therapeutics, Institute of Molecular Biosciences, Mahidol University, Salaya, Nakhon Pathom, Thailand

<sup>4</sup> Institute of Molecular Biosciences, Mahidol University, Nakhon Pathom, Thailand

\*Corresponding author: [Ekkaphot.kho@mahidol.ac.th](mailto:Ekkaphot.kho@mahidol.ac.th)

**Supplementary Files 1** 3D video on exosome uptake

**Supplementary Files 2** Expression result

**Supplementary Files 3** DEG analysis

**Supplementary Files 4** Uncropped western blot images

**Supplementary Table 1** List of mouse primers for qRT-PCR.

| Target       | Forward 5'→ 3'         | Reverse 5'→ 3'          |
|--------------|------------------------|-------------------------|
| <i>p21</i>   | AATCTGCGCTTGGAGTGATAG  | CTTGTCGCTGTCTTGCACT     |
| <i>p16</i>   | TTGGCCCAAGAGCGGGGACA   | GCGGGCTGAGGCCGGATTTA    |
| <i>NF-κB</i> | ACCTTTGCTGGAAACACACC   | ATGGCCTCGGAAGTTTCTTT    |
| <i>IL6</i>   | TACCACTTCACAAGTCGGAGGC | CTGCAAGTGCATCATCGTTGTTC |
| <i>GDF15</i> | AGCCGAGAGGACTCGAACTCAG | GGTTGACGCGGAGTAGCAGCT   |
| <i>GAPDH</i> | TGTGTCCGTCGTGGATCTGA   | CCTGCTTCACCACCTTCTTGA   |

**Supplementary Table 2** Software list

| <b>Tools</b> | <b>Description</b>                                                                                                            | <b>Linkages</b>                                                                                                                                           |
|--------------|-------------------------------------------------------------------------------------------------------------------------------|-----------------------------------------------------------------------------------------------------------------------------------------------------------|
| HISAT2       | A spliced read mapper for RNA-Seq                                                                                             | <a href="http://ccb.jhu.edu/software/hisat2/index.shtml">http://ccb.jhu.edu/software/hisat2/index.shtml</a>                                               |
| StringTie    | Transcript assembly for RNA-Seq                                                                                               | <a href="https://ccb.jhu.edu/software/stringtie/index.shtml">https://ccb.jhu.edu/software/stringtie/index.shtml</a>                                       |
| ASprofile    | ASprofile is a suite of programs for extracting, quantifying and comparing alternative splicing (AS) events from RNA-seq data | <a href="http://ccb.jhu.edu/software/ASprofile/">http://ccb.jhu.edu/software/ASprofile/</a>                                                               |
| BLAST        | Basic Local Alignment Search Tool                                                                                             | <a href="http://blast.ncbi.nlm.nih.gov/Blast.cgi">http://blast.ncbi.nlm.nih.gov/Blast.cgi</a>                                                             |
| DESeq        | An R package for RNA-Seq Differential Expression Analysis based on a model using the negative binomial distribution           | <a href="http://www.bioconductor.org/packages/release/bioc/html/DESeq.html">http://www.bioconductor.org/packages/release/bioc/html/DESeq.html</a>         |
| EBSeq        | An R package for RNA-Seq Differential Expression Analysis based on Bayesian approach                                          | <a href="https://www.biostat.wisc.edu/~kendzior/EBSEQ/">https://www.biostat.wisc.edu/~kendzior/EBSEQ/</a>                                                 |
| Cytoscape    | An open-source software platform for visualizing complex networks                                                             | <a href="http://www.cytoscape.org/">http://www.cytoscape.org/</a>                                                                                         |
| topGO        | An R package for gene ontology enrichment analysis                                                                            | The bioinformatic analysis software not given in the report                                                                                               |
| rMATs        | MATS is a computational tool to detect differential alternative splicing events from RNA-Seq data.                            | <a href="http://rnaseq-mats.sourceforge.net/">http://rnaseq-mats.sourceforge.net/</a>                                                                     |
| TFBSTools    | An R package for the analysis and manipulation of transcription factor binding sites.                                         | <a href="http://www.bioconductor.org/packages/release/bioc/html/TFBSTools.html">http://www.bioconductor.org/packages/release/bioc/html/TFBSTools.html</a> |

**Supplementary Table 3** Database list

| Database   | Description                                                                                                                   | Homepage                                                                            |
|------------|-------------------------------------------------------------------------------------------------------------------------------|-------------------------------------------------------------------------------------|
| NR         | non-redundant protein sequence database                                                                                       | <a href="ftp://ftp.ncbi.nih.gov/blast/db/">ftp://ftp.ncbi.nih.gov/blast/db/</a>     |
| Swiss-Prot | A manually annotated, non-redundant protein sequence database                                                                 | <a href="http://www.uniprot.org/">http://www.uniprot.org/</a>                       |
| GO         | Gene Ontology database                                                                                                        | <a href="http://www.geneontology.org/">http://www.geneontology.org/</a>             |
| COG        | The database of Clusters of Orthologous Groups of proteins                                                                    | <a href="http://www.ncbi.nlm.nih.gov/COG/">http://www.ncbi.nlm.nih.gov/COG/</a>     |
| KOG        | The database of Clusters of Protein homology                                                                                  | <a href="http://www.ncbi.nlm.nih.gov/KOG/">http://www.ncbi.nlm.nih.gov/KOG/</a>     |
| Pfam       | The database of Homologous protein family                                                                                     | <a href="http://pfam.xfam.org/">http://pfam.xfam.org/</a>                           |
| KEGG       | The database of Kyoto Encyclopedia of Genes and Genomes                                                                       | <a href="http://www.genome.jp/kegg/">http://www.genome.jp/kegg/</a>                 |
| STRING     | Search Tool for the Retrieval of Interacting Genes/Proteins                                                                   | <a href="http://www.string-db.org/">http://www.string-db.org/</a>                   |
| Ensembl    | Database Sscrofa10.2 download from                                                                                            | <a href="http://asia.ensembl.org/index.html">http://asia.ensembl.org/index.html</a> |
| Cosmic     | COSMIC, is the world's largest and most comprehensive resource for exploring the impact of somatic mutations in human cancer. | <a href="https://cancer.sanger.ac.uk/cosmic">https://cancer.sanger.ac.uk/cosmic</a> |
| JASPAR     | Database of transcription factor binding profiles                                                                             | <a href="http://jaspar.genereg.net/">http://jaspar.genereg.net/</a>                 |

**Supplementary Table 4** Description on annotation databases

| Database name      | Database description                                                                                                                                                                                                                                                                                                                                                                                                                                                                                                                                                                                                                                                                             |
|--------------------|--------------------------------------------------------------------------------------------------------------------------------------------------------------------------------------------------------------------------------------------------------------------------------------------------------------------------------------------------------------------------------------------------------------------------------------------------------------------------------------------------------------------------------------------------------------------------------------------------------------------------------------------------------------------------------------------------|
| NR database        | Non-redundant protein database in NCBI, including Swissprot, PIR (Protein Information Resource), PRF (Protein Research Foundation), PDB (Protein Data Bank) protein database and CDS from GenBank and RefSeq                                                                                                                                                                                                                                                                                                                                                                                                                                                                                     |
| Swissprot database | A database maintained by EBI (European Bioinformatics Institute) containing a collated database of protein annotation information with relevant references and high credibility                                                                                                                                                                                                                                                                                                                                                                                                                                                                                                                  |
| COG database       | A database for homologous classification of gene products. It is an early database for the identification of orthologous genes, which is obtained by comparing a large number of protein sequences of various organisms.                                                                                                                                                                                                                                                                                                                                                                                                                                                                         |
| KOG database       | For eukaryotes, homologous genes from different species are divided into different Ortholog clusters based on gene orthologous relationships and evolutionary relationships. Currently, KOG has 4852 classifications. Genes from the same Ortholog have the same function, so that functional annotations can be directly inherited to other members of the same KOG cluster.                                                                                                                                                                                                                                                                                                                    |
| Pfam database      | The most comprehensive classification system for protein domain annotations. Proteins are composed of domains, and the protein sequences of each particular domain are somewhat conserved. Pfam divides the protein domain into different protein families, and establishes an HMM statistical model of the amino acid sequence of each family through alignment of protein sequences.                                                                                                                                                                                                                                                                                                           |
| GO database        | The internationally standardized gene function classification system provides a dynamically updated standard vocabulary to fully describe the functional properties of genes and gene products in organisms. There are three main categories of the database, namely molecular function, cellular component and biological process, each describing the molecular function that the gene product may perform, and the cellular environment and Participation in biological processes. The most basic concept in the GO database is Term, each entry has a Term name, such as "cell", "fibroblast growth factor receptor binding" or "signal transduction", with a unique number, like GO:nnnnnnn |
| KEGG database      | A database that systematically analyzes the metabolic pathways of gene products in cells and the function of these gene products. It integrates data on genomics, chemical molecules, and biochemical systems, including PATHWAY, DRUG, DISEASE, GENES, and GENOME. Using this database helps to study the genes and their expressions as a whole network.                                                                                                                                                                                                                                                                                                                                       |

**Supplementary Table 5** Sample information for mRNA-sequencing

| #ID   | read1_name                       | read2_name                       |
|-------|----------------------------------|----------------------------------|
| CTL1  | Unknown_CP734-001T0001_good_1.fq | Unknown_CP734-001T0001_good_2.fq |
| CTL2  | Unknown_CP734-001T0002_good_1.fq | Unknown_CP734-001T0002_good_2.fq |
| CTL3  | Unknown_CP734-001T0003_good_1.fq | Unknown_CP734-001T0003_good_2.fq |
| DG1   | Unknown_CP734-001T0004_good_1.fq | Unknown_CP734-001T0004_good_2.fq |
| DG2   | Unknown_CP734-001T0005_good_1.fq | Unknown_CP734-001T0005_good_2.fq |
| DG3   | Unknown_CP734-001T0006_good_1.fq | Unknown_CP734-001T0006_good_2.fq |
| DGEx1 | Unknown_CP734-001T0007_good_1.fq | Unknown_CP734-001T0007_good_2.fq |
| DGEx2 | Unknown_CP734-002T0001_good_1.fq | Unknown_CP734-002T0001_good_2.fq |
| DGEx3 | Unknown_CP734-001T0008_good_1.fq | Unknown_CP734-001T0008_good_2.fq |

Note: #ID:sample name; read1\_name & read2\_name:Double-ended fq file name corresponding to the sample name.

**Supplementary Table 6** Sequencing data Statistics

| #SampleID | ReadSum  | BaseSum  | GC (%) | N (%) | Q20(%) | Q30(%) |
|-----------|----------|----------|--------|-------|--------|--------|
| CTL1      | 19829143 | 5.92E+09 | 49.79  | 0     | 99.85  | 98.76  |
| CTL2      | 21755225 | 6.49E+09 | 49.61  | 0.02  | 98.79  | 94.99  |
| CTL3      | 20372686 | 6.08E+09 | 50.05  | 0.01  | 98.89  | 95.36  |
| DG1       | 21125385 | 6.3E+09  | 50.13  | 0.02  | 98.68  | 94.72  |
| DG2       | 20400624 | 6.09E+09 | 49.45  | 0.01  | 98.86  | 95.38  |
| DG3       | 21236873 | 6.34E+09 | 49.99  | 0.01  | 98.86  | 95.25  |
| DGEx1     | 20293541 | 6.07E+09 | 51     | 0.01  | 98.86  | 95.34  |
| DGEx2     | 22084086 | 6.6E+09  | 50.47  | 0.01  | 98.88  | 95.42  |
| DGEx3     | 21632825 | 6.47E+09 | 50.54  | 0.02  | 98.76  | 94.88  |

Note:

- (1) Samples: Sample name;
- (2) Clean reads: Counts of clean PE reads;
- (3) Clean bases: total base number of Clean Data;
- (4) GC content: Percentage of G, C in clean data.
- (5)  $\geq$ Q30%: Percentage of bases with Q-score no less than Q30.

**Supplementary Table 7** Statistics on data mapping

| Sample | Total Reads | Mapped Reads           | Uniq Mapped Reads      | Multiple Map Reads   | Reads Map to '+'       | Reads Map to '-'       |
|--------|-------------|------------------------|------------------------|----------------------|------------------------|------------------------|
| CTL1   | 39658286.00 | 38,044,113<br>(95.93%) | 34,888,310<br>(87.97%) | 3,155,803<br>(7.96%) | 21,010,023<br>(52.98%) | 20,993,585<br>(52.94%) |
| CTL2   | 43510450.00 | 41,393,251<br>(95.13%) | 37,893,988<br>(87.09%) | 3,499,263<br>(8.04%) | 22,871,461<br>(52.57%) | 22,866,541<br>(52.55%) |
| CTL3   | 40745372.00 | 38,677,910<br>(94.93%) | 35,553,675<br>(87.26%) | 3,124,235<br>(7.67%) | 21,295,490<br>(52.26%) | 21,287,769<br>(52.25%) |
| DG1    | 42250770.00 | 39,691,063<br>(93.94%) | 36,595,130<br>(86.61%) | 3,095,933<br>(7.33%) | 21,802,760<br>(51.60%) | 21,777,413<br>(51.54%) |
| DG2    | 40801248.00 | 36,265,809<br>(88.88%) | 33,538,161<br>(82.20%) | 2,727,648<br>(6.69%) | 19,846,596<br>(48.64%) | 19,838,251<br>(48.62%) |
| DG3    | 42473746.00 | 40,196,814<br>(94.64%) | 37,046,210<br>(87.22%) | 3,150,604<br>(7.42%) | 22,077,305<br>(51.98%) | 22,054,631<br>(51.93%) |
| DGEx1  | 40587082.00 | 38,649,165<br>(95.23%) | 36,097,856<br>(88.94%) | 2,551,309<br>(6.29%) | 20,979,844<br>(51.69%) | 20,966,220<br>(51.66%) |
| DGEx2  | 44168172.00 | 42,202,397<br>(95.55%) | 38,900,197<br>(88.07%) | 3,302,200<br>(7.48%) | 23,169,263<br>(52.46%) | 23,155,199<br>(52.43%) |
| DGEx3  | 43265650.00 | 41,261,149<br>(95.37%) | 38,326,028<br>(88.58%) | 2,935,121<br>(6.78%) | 22,508,378<br>(52.02%) | 22,494,249<br>(51.99%) |

Note:

Sample: sample ID in system;

Total Reads: Counts of Clean Reads, counted as single end;

Mapped Reads: Counts of mapped reads and the proportion of that in clean data;

Uniq Mapped Reads: Counts of reads mapped to a unique position on reference genome and proportion of that in clean data;

Multiple Mapped Reads: Counts of reads mapped to multiple positions on reference genome and proportion of that in clean data;

Reads Map to '+': Counts of reads mapped to the sense chain and the proportion of that in clean data;

Reads Map to '-': Counts of reads mapped to antisense chain and proportion of that in clean data.



## **Supplementary Figure 1**

**Schematic overview of experimental workflow for assessing the transcriptomic effects of hASC-derived exosomes on D-galactose–induced neuronal cells.** Human adipose-derived stem cells (hASCs) were exposed to serum-free medium for 48 h, and the conditioned media (CM) were collected, centrifuged (2,000 g, 10 min), and filtered (0.22  $\mu$ m) prior to storage at –80 °C. Exosomes were subsequently purified and concentrated from CM using a Macrosep 100K ultrafiltration device with repeated centrifugation (2,000 g, 15 min, 6 cycles). Purified hASC-derived exosomes were characterized by nanoparticle tracking analysis, cryo-electron microscopy (cryo-EM), Western blot, and PKH26 staining. For transcriptomic analysis, neuronal CAD cells were divided into three groups: untreated cells (A), D-galactose–treated cells (B), and D-galactose plus hASC-exosome–treated cells (C). Total RNA was extracted and subjected to Illumina sequencing, followed by bioinformatics analysis.

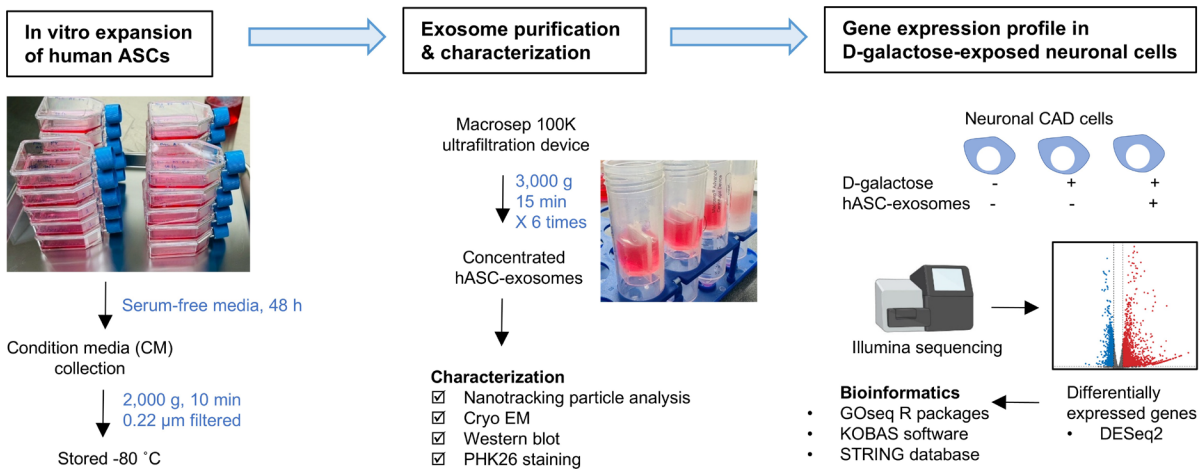

## **Supplementary Figure 2**

**D-galactose induced DNA-damage response in neuronal CAD cells.** The CAD cells were exposed to D-galactose (DG, 400 mM) for 24. The immunocytochemistry stained for  $\gamma$ -H2AX, a marker of DNA damage showed the increased number of the  $\gamma$ -H2AX-positive cells after DG exposure. DAPI stained for nucleus. Scale bar is 100  $\mu$ m.

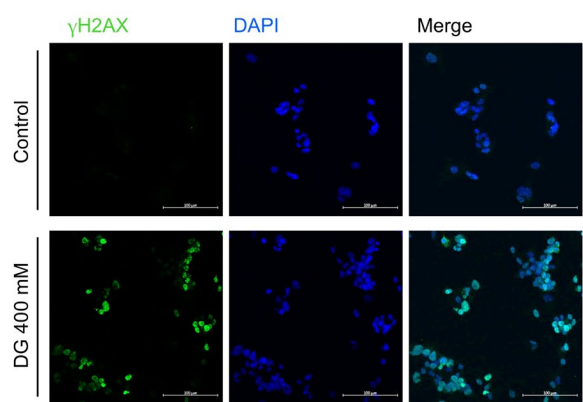

### **Supplementary Figure 3**

**Diagram showing the workflow of bulk mRNA-sequencing and downstream analysis.** (a)

the sequential steps of mRNA isolation, enrichment, and preparation for mRNA-sequencing analysis. (b) The diagram showing the post-sequencing steps including data quality control (QC), genome alignment, expression quantification, differential expression analysis, and functional annotation.

**a**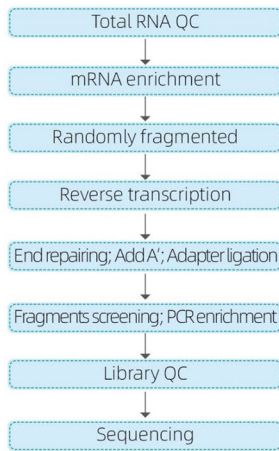**b**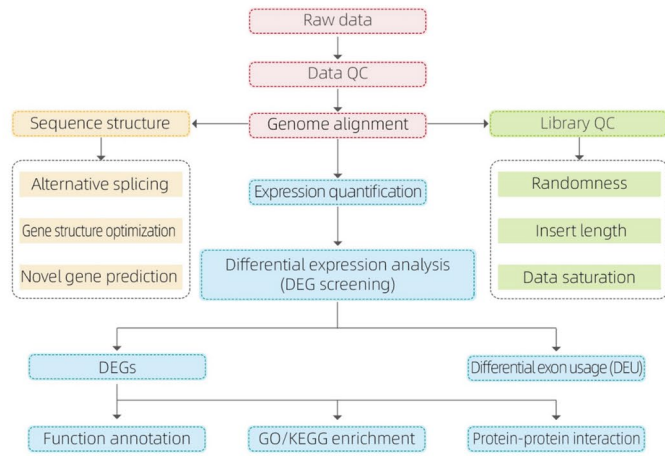

#### **Supplementary Figure 4**

##### **MA plots illustrating the overall distribution of gene expression of the mRNA-seq data.**

MA plot of the gene expression and fold change of expression levels between (a) A vs B, and (b) B vs C samples. Note that each dot represents a single gene. X-axis represents values of  $\log_2$  (FPKM). Y-axis represents values of  $\log_2$ (FC). The dots colored in red and blue stand for significant up-regulated and down-regulated genes respectively. Black dots stand for the genes without significant difference in expression between two samples. A: Untreated cells, B: D-galactose-induced cells, C: DG+ hASC-exosome treated cells.

**a**

A vs B

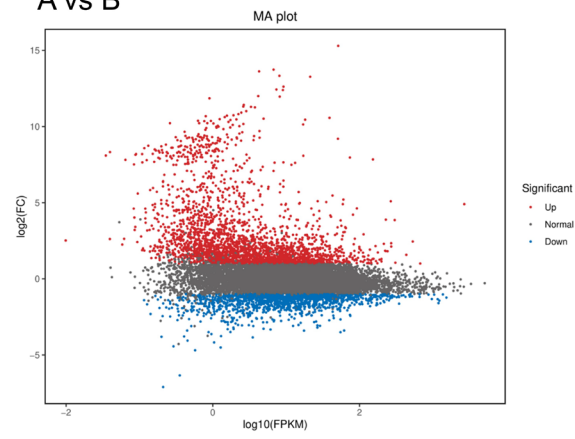

**b**

B vs C

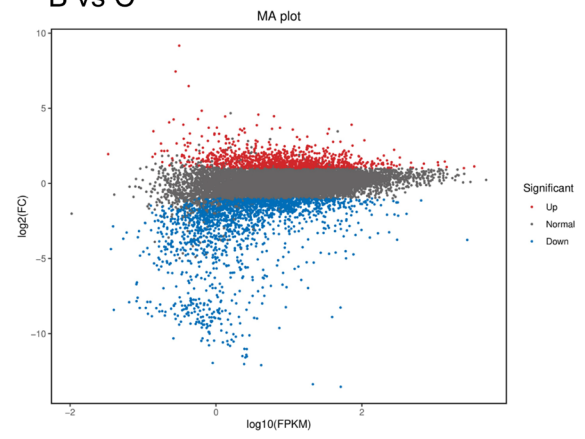



### Supplementary Figure 5

**Venn Diagram showing the number of unique DEGs (1,597 and 659) between each comparing group and overlapping DEGs (2,360).** I represents a total number of DEGS between A vs B, while II represents a total number of DEGs between B vs C. A: Untreated cells, B: D-galactose-induced cells, C: DG+ hASC-exosome treated cells.

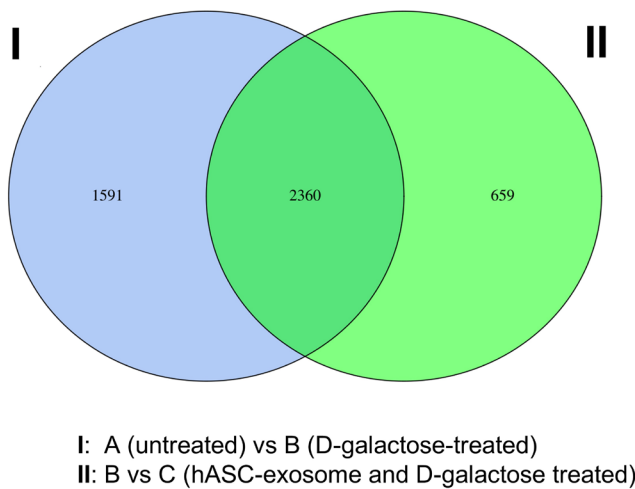

Supplementary Figure 6

Gene Ontology (GO) classification of DEGs in each comparing group including (a) A vs B, and (b) B vs C. The bar graph illustrates the number of upregulated (dark color) and downregulated (lighter color) genes associated with each GO category, including Biological Process, Cellular Component, and Molecular Function.

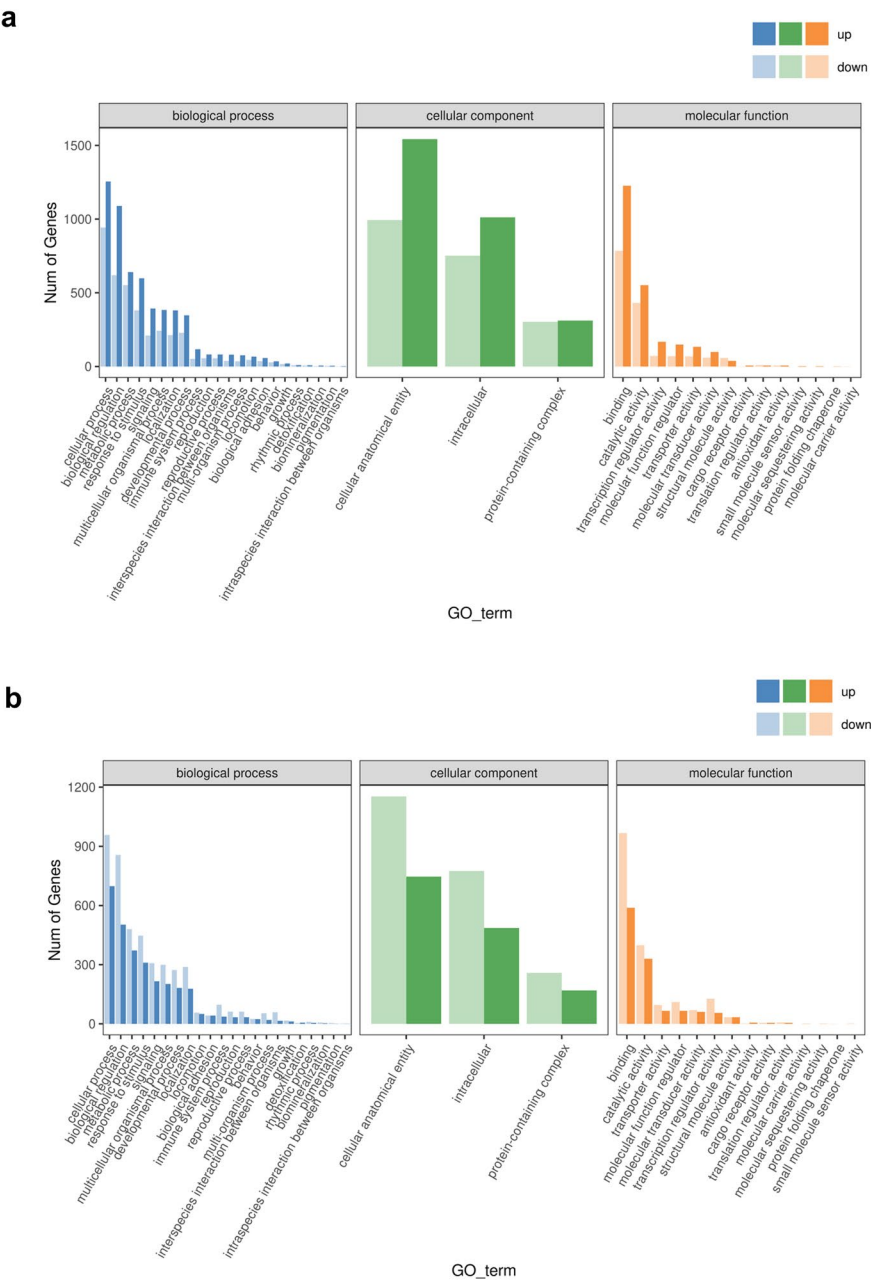

## **Supplementary Figure 7**

### **KEGG pathway enrichment analysis of total DEGs identified from each comparing group.**

(a) KEGG pathway enrichment analysis of total DEGs from group B vs C. Key pathways such as p53 signaling pathway, Cell cycle, DNA replication, and Pyrimidine metabolism are highlighted.

(b) KEGG pathway enrichment analysis of total DEGs from group B vs C. Key pathways such as MAPK signaling pathway, cAMP signaling pathway, Longevity regulating pathway, FoxO signaling pathway, and Estrogen signaling pathway are highlighted. The scatter plot displays enriched pathways based on the Rich factor (x-axis), with the number of genes involved represented by the size of each dot and the q-value indicated by color (from blue to red, where red denotes higher significance).

a

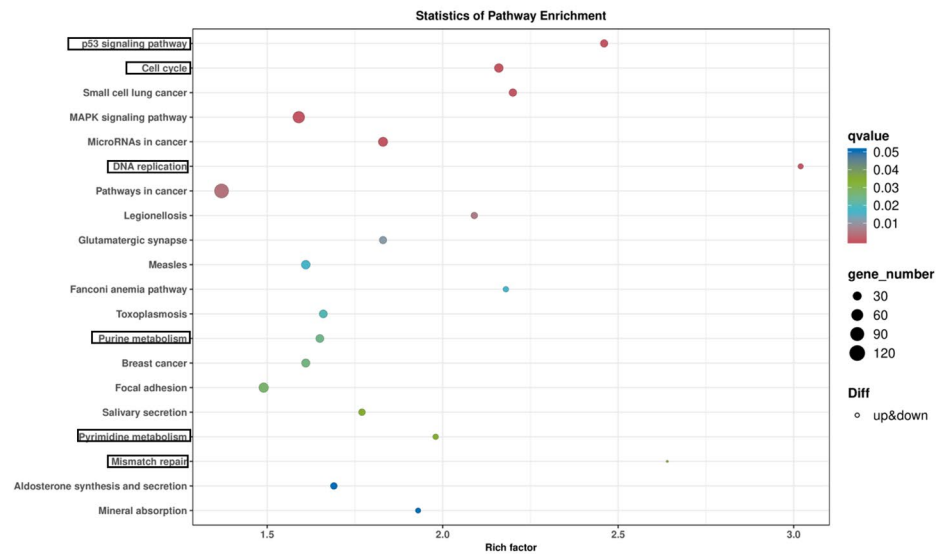

b

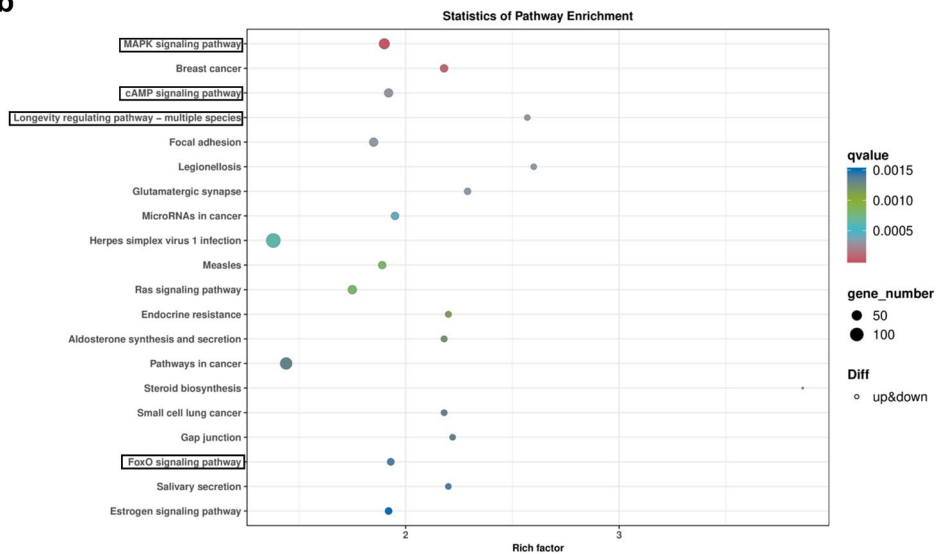

## Supplementary Figure 8

**Functional enrichment analysis of differentially expressed genes in A vs B.** (a) KEGG pathway enrichment analysis of upregulated DEGs. The bar chart displays the percentage and number of annotated genes associated with significantly enriched pathways. (b) GO term enrichment analysis of downregulated DEGs. Bar chart showing significantly enriched Biological Process. The x-axis indicates the number of genes (GeneNum) associated with each term, and bar colors reflect statistical significance (q-values). (c) Network diagram illustrating gene-to-process associations of the downregulated DEGs, focusing on Cellular Component categories. Genes are connected to their respective biological processes, with color-coded categories. Fold change values are represented by shades of blue, suggesting key structural regions affected by gene downregulation under D-galactose exposure in neuronal cells.

a

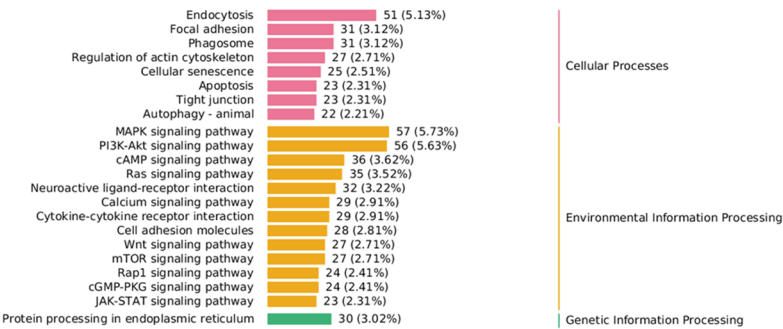

b

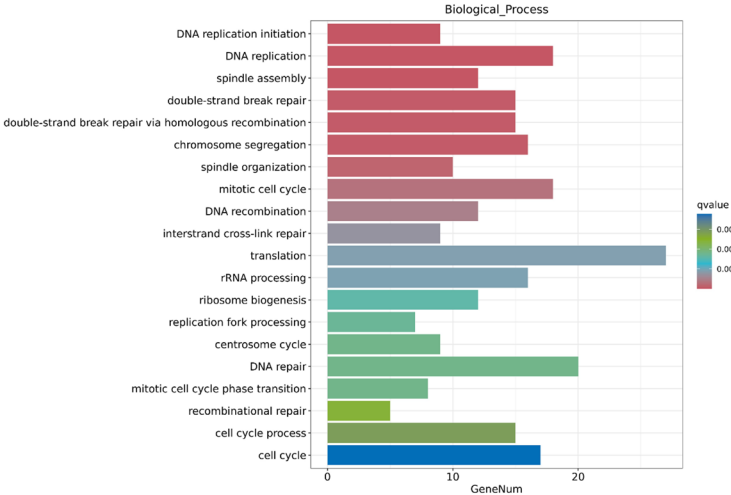

c

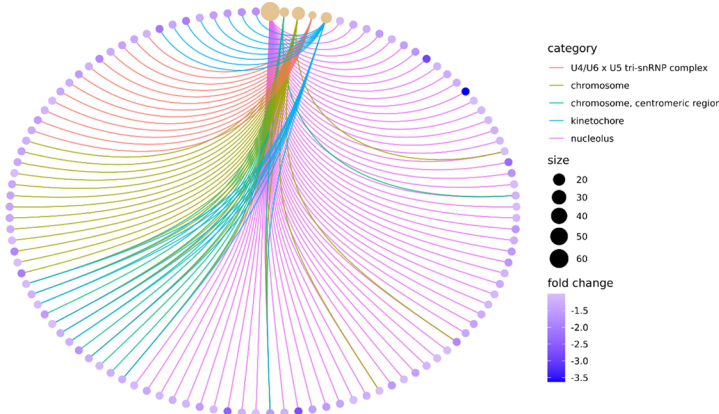

## Supplementary Figure 9

**The eggNOG functional classification of consensus sequences of DEGs.** The bar chart displays the frequency of sequences assigned to various functional categories (A–Z) based on eggNOG annotations. (a) eggNOG functional classification of consensus sequences of upregulated DEGs from group A vs B. The upregulated DEGs from group A vs B are enriched in transcription-related functions. (b) eggNOG functional classification of consensus sequences derived from downregulated DEGs between group B and group C. Notably, category K (Transcription) is highlighted, indicating a marked reduction in transcription-related functions. This suggests a shutdown of transcriptional activity, consistent with a broader suppression of gene expression in group B compared to group C.

**a** Upregulated genes in A vs B

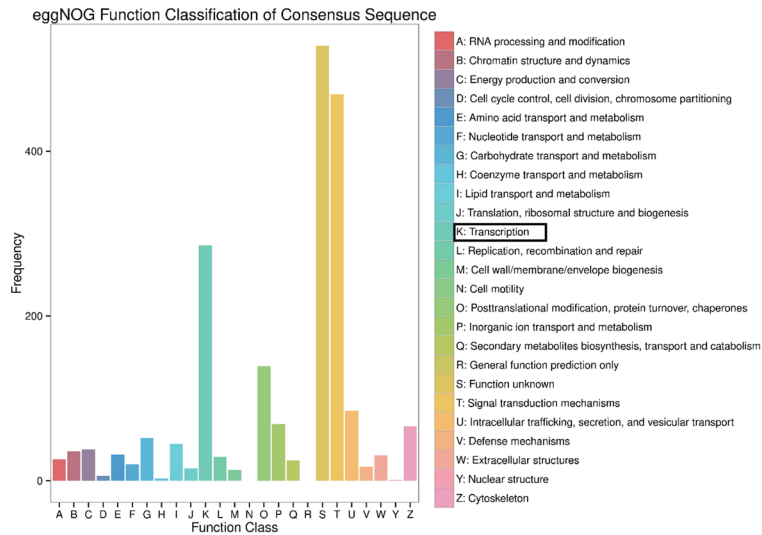

**b** Downregulated genes in B vs C

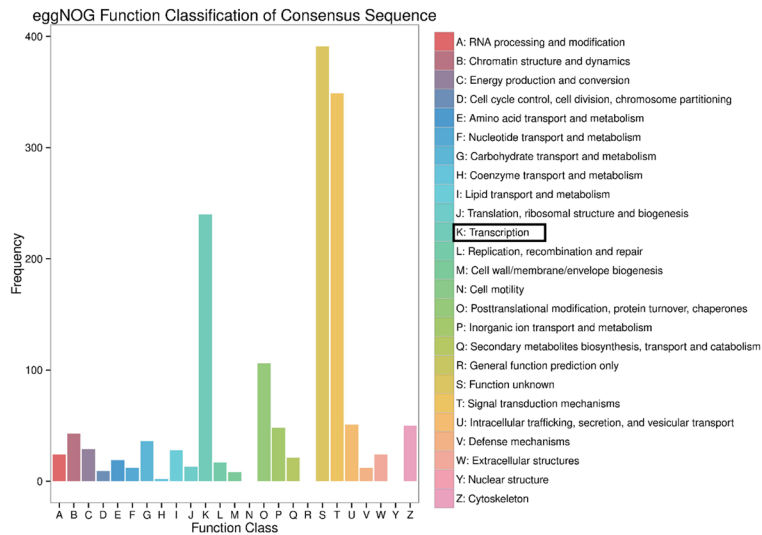



## **Supplementary Figure 10**

**KEGG pathway enrichment analysis of downregulated DEGs between group B vs C.** The bar chart displays the number and percentage of genes annotated to significantly enriched pathways across multiple functional categories, including apoptosis and cellular senescence. Highlighted cellular processes (square) are apoptosis and cellular senescence and age-implicated pathways

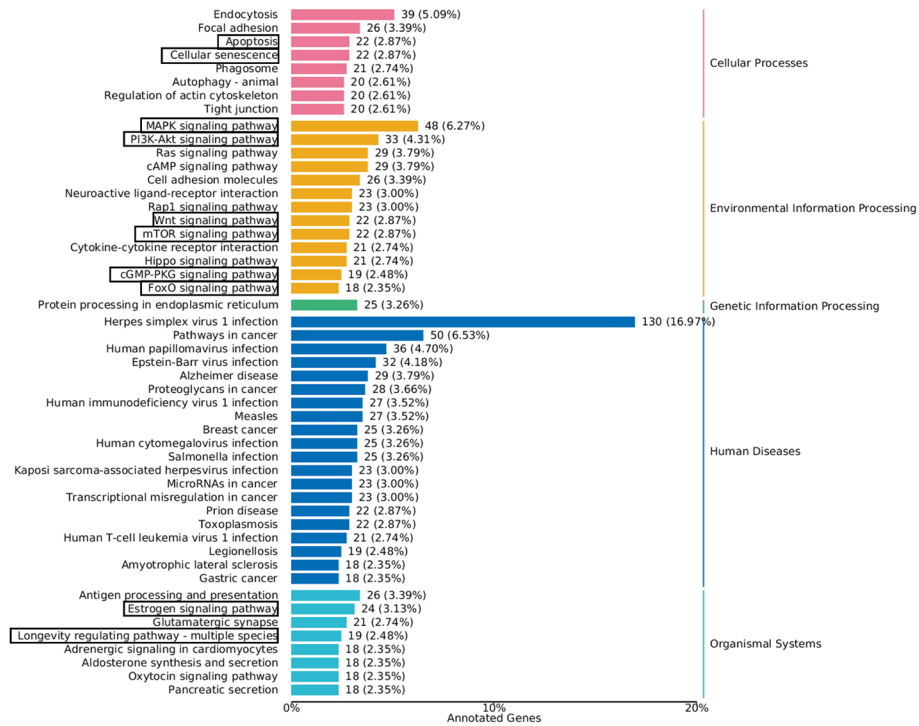

Supplement: Supplementary file 1 [file 1b6d4b93c1ba42d894645227.pdf]
